# Supplementary material for: Investigation of Risk Factors for Autism Spectrum Disorder in Children with Tuberous Sclerosis Complex
Source: Research Square preprint supplement (doi:10.21203/rs.3.rs-7847334/v1), 2025-11-05
Supplement: Supplementary file 1 [file 5396303f28563ff2b99fa796.xlsx]

## Sheet: Sheet1
Group	Sex（1=male；2=female）	diagnosis age（month）	mTOR Inhibitor （1=with；0=without）	Remission rate（N%）	Seizure-free rate（N%）	Effective rate of drug treatment（N%）	Social improvement（1=yes；0=no）	Number of unpigmented macules	The EEG range is larger than the MRI range（1=yes；0=no）	Burden of Nodule on MRI	frontal cortex nodule（1=yes；0=no）	Organs with hamartoma	Heart with hamartoma（N）	Kidney with hamartoma（N）	Eyes with hamartoma（N）	Liver with hamartoma（N）
1	0	14	1	64	0	1	1	5	0	Frontal Lobe	1	0	0	0	0	0
1	1	3	1	0	0	0	0	0	1	Frontal Lobe	1	0	0	0	0	0
1	1	9	0	0	0	0	1	4	0	No Finding	0	0	0	0	0	0
1	1	9	0	100	1	1	0	0	0	Scattered Distribution	0	0	0	0	0	0
1	0	30	1	0	0	0	1	0	0	Frontal Lobe	1	0	0	0	0	0
1	1	7	0	50	0	1	0	0	0	Scattered Distribution	0	0	0	0	0	0
1	0	61	0	50	0	1	0	0	0	No Finding	0	0	0	0	0	0
1	1	4	1	0	0	0	0	0	0	No Finding	0	0	0	0	0	0
1	0	0	0	100	1	1	0	0	0	No Finding	0	0	0	0	0	0
1	0	0	0	100	1	1	0	0	0	No Finding	0	0	0	0	0	0
1	1	4	1	50	0	1	0	0	0	Temporal Lobe	0	0	0	0	0	0
1	0	30	1	100	1	1	0	0	0	No Finding	0	0	0	0	0	0
1	1	0	0	100	1	1	1	0	0	No Finding	0	0	0	0	0	0
1	0	6	0	0	0	0	0	0	0	Scattered Distribution	0	0	0	0	0	0
1	1	4	1	93	0	1	0	0	1	Occipital Lobe	0	0	0	0	0	0
1	0	19	0	100	1	1	1	0	0	No Finding	0	0	0	0	0	0
1	1	3	1	0	0	0	0	0	1	Frontal Lobe	1	0	0	0	0	0
1	0	0	1	0	0	0	0	0	0	Scattered Distribution	0	0	0	0	0	0
1	1	25	1	100	1	1	0	0	0	Frontal Lobe	1	0	0	0	0	0
1	0	18	1	0	0	0	0	7	0	Frontal Lobe	1	0	0	0	0	0
1	0	15	0	50	0	1	0	20	0	No Finding	0	0	0	0	0	0
1	1	7	1	100	1	1	0	7	0	No Finding	0	0	0	0	0	0
1	1	0	1	100	1	1	0	0	0	Lateral Periventricular White Matter	0	0	0	0	0	0
1	1	0	1	50	0	1	0	8	0	No Finding	0	0	0	0	0	0
1	0	0	1	0	0	0	0	1	1	Lateral Periventricular White Matter	0	0	0	0	0	0
1	1	13	0	33	0	0	1	7	1	Scattered Distribution	0	0	0	0	0	0
1	1	56	1	0	0	0	0	3	0	No Finding	0	0	0	0	0	0
1	1	3	1	0	0	0	1	4	0	No Finding	0	0	0	0	0	0
1	1	3	1	100	1	1	1	0	0	No Finding	0	0	0	0	0	0
1	1	0	1	100	1	1	1	0	0	Lateral Periventricular White Matter	0	0	0	0	0	0
1		0	1	100	1	1	1	0	0	No Finding	0	0	0	0	0	0
1	1	5	0	0	0	0	0	2	0	No Finding	0	Heart	1	0	0	0
1	1	3	1	60	0	1	0	10	1	Frontal Lobe	1	Heart、Kidney	1	1	0	0
1	1	7	1	50	0	1	0	8	1	Frontal Lobe	1	0	0	0	0	0
1	0	0	1	50	0	1	1	1	0	Scattered Distribution	0	Heart	1	0	0	0
1	1	30	1	0	0	0	0	10	0	No Finding	0	Heart、Kidney	1	1	0	0
1	1	0	1	0	0	0	1	10	0	Scattered Distribution	0	0	0	0	0	0
1	0	2	1	0	0	0	1	10	1	Lateral Periventricular White Matter	0	Heart、Kidney	1	1	0	0
1	1	0	1	0	0	0	0	30	0	Scattered Distribution	0	Heart、Kidney	1	1	0	0
1	1	0	1	50	0	1	0	3	0	Scattered Distribution	0	Heart	1	0	0	0
1	1	4	1	33	0	0	1	20	0	Scattered Distribution	0	Heart	1	0	0	0
1	0	0	1	100	1	1	1	16	1	Frontal Lobe	1	0	0	0	0	0
1	0	0	1	100	1	1	0	0	0	No Finding	0	0	0	0	0	0
1	1	0	0	100	1	1	0	5	1	Scattered Distribution	0	0	0	0	0	0
1	1	27	0	0	0	0	0	2	0	No Finding	0	0	0	0	0	0
1	1	0	1	0	0	0	1	8	0	No Finding	0	0	0	0	0	0
1	1	12	0	100	1	1	0	3	1	Temporal Lobe	0	0	0	0	0	0
1	1	0	1	100	1	1	1	1	0	No Finding	1	0	0	0	0	0
1	1	6	1	99	0	1	0	4	0	Frontal Lobe	1	0	0	0	0	0
1		0	0	100	1	1	0	0	0	No Finding	0	0	0	0	0	0
1	1	3	1	88	0	1	0	10	0	No Finding	0	0	0	0	0	0
1	0	13	1	30	0	0	1	8	0	Frontal Lobe	1	0	0	0	0	0
1	0	0	0	0	0	0	0	0	0	No Finding	0	0	0	0	0	0
1	1	27	0	99	0	1	0	10	1	Scattered Distribution	0	0	0	0	0	0
1	0	12	0	100	1	1	0	3	0	Lateral Periventricular White Matter	0	0	0	0	0	0
1	0	12	1	99	0	1	0	6	0	Frontal Lobe	1	Kidney、Heart	1	1	0	0
1	0	15	1	93	0	1	1	5	0	No Finding	0	Kidney、Heart	1	1	0	0
1	1	5	0	100	1	1	0	10	0	Frontal Lobe	0	Kidney、Heart	1	1	0	0
1	1	11	1	0	0	0	0	0	0	No Finding	0	0	0	0	0	0
1	1	1	1	0	0	0	0	30	1	Frontal Lobe	0	0	0	0	0	0
1	0	16	0	20	0	0	0	4	1	Frontal Lobe	0	Heart	1	0	0	0
1	1	6	0	0	0	0	0	0	1	Scattered Distribution	0	Heart、Kidney	1	1	0	0
2	0	0		0	0	0		4	0	Parietal Lobe	0	0	0	0	0	0
2	1	5		63	0	1		0	0	No Finding	0	0	0	0	0	0
2	1	0.3		100	1	1		10	0	Frontal Lobe	1	0	0	0	0	0
2	1	21		0	0	0		6	0	Frontal Lobe	1	0	0	0	0	0
2	0	4		0	0	0		4	0	No Finding	0	Eye	0	0	1	0
2	0	3		25	0	0		10	1	Corona Radiata	0	Heart	1	0	0	0
2	1	0.5		57	0	1		4	0	No Finding	0	Heart、Kidney、Eye	1	1	1	0
2	0	7		100	1	1		6	1	Frontal Lobe	1	0	0	0	0	0
2	0	3		80	0	1		5	1	Frontal Lobe	1	0	0	0	0	0
2	0	6		0	0	0		10	0	Frontal Lobe	1	Heart、Liver	1	0	0	1
2	1	6		100	1	1		3	1	Frontal Lobe	0	Heart	1	0	0	0
2	0	4		66.7	0	1		0	0	Frontal Lobe	1	Heart、Kidney	1	1	0	0
2	1	0		100	1	1		6	0	No Finding	0	Heart、Eye	1	0	1	0
2	1	25		50	0	0		0	0	Frontal Lobe	1	0	0	0	0	0
2	1	16		100	1	1		4	0	No Finding	0	0	0	0	0	0
2	1	6		0	0	0		0	1	Frontal Lobe	1	Heart、	1	0	0	0
2	1	3		75	0	1		20	1	Basal Ganglia	0	Eye	0	0	0	0
2	1	5		0	0	0		2	0	No Finding	0	Heart	1	0	0	0
2	1	16		0	0	0		0	0	No Finding	0	0	0	0	0	0
2	1	2		0	0	0		7	0	Frontal Lobe	1	0	0	0	0	0
2	0	8		0	0	0		5	0	No Finding	0	Heart	1	0	0	0
2	0	24		40	0	0		0	0	No Finding	0	Heart	1	0	0	0
2	0	6		0	0	0		0	0	No Finding	0	Kidney、Eye	0	1	1	0
2	0	16		100	1	1		0	0	No Finding	0	0	0	0	0	0
2	0	9		0	0	0		0	0	No Finding	0	Heart、Kidney	1	1	1	0
2	1	3		0	0	0		0	0	No Finding	0	0	0	0	0	0
2	1	0		100	1	1		0	0	No Finding	0	0	0	0	0	0
2	0	14		98	0	1		6	0	Frontal Lobe	1	Heart、	1	0	0	0
2	1	23		95	0	1		10	0	Frontal Lobe	0	0	0	0	0	0
2	1	1		0	0	0		7	0	No Finding	0	Heart	1	0	0	0
2	0	9		100	1	1		7	0	Frontal Lobe	1	0	0	0	0	0
2	0	1		100	1	1		30	0	No Finding	0	Heart	1	0	0	0
2	0	2		0	0	0		10	0	No Finding	0	Eye、Kidney、Heart	1	1	1	0
2	1	0		100	1	1		6	0	No Finding	0	Heart、Eye	1	0	1	0
2	0	2		0	0	0		4	0	Frontal Lobe	1	Eye、Kidney、Heart	1	1	1	0
2	1	8		0	0	0		0	0	No Finding	0	Heart	1	0	0	0
2	1	3		100	1	1		0	0	Frontal Lobe	1	0	0	0	0	0
2	1	22		0	0	0		0	0	Frontal Lobe	1	0	0	0	0	0
2	0	3		0	0	0		8	0	No Finding	0	Heart	1	0	0	0
2	1	0		99	0	1		1	1	Frontal Lobe	1	Heart、Eye	1	0	1	0
2	1	39		100	1	1		0	1	Basal Ganglia	0	0	0	0	0	0
2	0	24		100	1	1		3	1	Frontal Lobe	1	0	0	0	0	0
2	0	0		100	1	1		1	0	No Finding	0	Heart	1	0	0	0
2	1	21		0	0	0		3	0	Frontal Lobe	1	0	0	0	0	0
2	0	3		100	1	1		0	0	No Finding	0	0	0	0	0	0
2	0	3		0	0	0		0	0	No Finding	0	Heart	1	0	0	0
2	1	11		0	0	0		12	0	Frontal Lobe	1	Eye、Heart	1	0	1	0
2	0	1		0	0	0		0	1	Lateral Periventricular White Matter	0	Heart	1	0	0	0
2	0	0		100	1	1		10	0	No Finding	0	Liver、Kidney	0	1	0	0
2	1	0		100	1	1		3	0	No Finding	0	0	0	0	0	0
2	1	8		0	0	0		0	1	Basal Ganglia	0	0	0	0	0	0
2	0	10		100	1	1		10	0	No Finding	0	Heart	1	0	0	0
2	1	13		0	0	0		9	0	No Finding	0	0	0	0	0	0
2	0	16		100	1	1		0	1	Frontal Lobe	0	Kidney、	0	1	0	0
2	0	16		0	0	0		10	0	Frontal Lobe	1	0	0	0	0	0
2	1	2		97	0	1		11	0	No Finding	0	Heart、Eye、Kidney、	0	1	1	0
2	0	15		100	0	1		6	0	No Finding	0	Heart、Kidney	0	1	0	0
2	1	16		67	0	1		3	1	Frontal Lobe	1	Heart、	0	0	0	0
2	0	19		0	0	0		10	0	Frontal Lobe	1	0	0	0	0	0
2	0	6		0	0	0		12	0	No Finding	0	Heart	1	0	0	0
2	0	1		0	0	0		0	1	Lateral Periventricular White Matter	0	0	0	0	0	0
2	0	6		100	1	1		3	1	Parietal Lobe	0	Heart、Kidney、	1	1	0	0
2	1	53		100	1	1		0	0	Frontal Lobe	0	Heart	1	0	0	0
2	0	28		100	1	1		0	0	Frontal Lobe	0	0	0	0	0	0
2	1	3		0	0	0		0	0	No Finding	0	Eye	0	0	0	0
2	0	21		100	1	1		7	0	No Finding	0	0	0	0	0	0
2	0	4		100	1	1		1	1	Basal Ganglia	0	Kidney、Eye	0	1	1	0
2	1	13		98	0	1		0	0	Frontal Lobe	1	Heart、	1	0	0	0
2	1	6		100	1	1		3	0	Frontal Lobe	1	Kidney、Eye	0	1	1	0
2	1	4		97	0	1		1	1	Scattered Distribution	0	Heart、Kidney、Eye	1	1	1	0
2	0	49		0	0	0		0	0	Parietal Lobe	0	Heart	1	0	0	0
2	1	37		100	1	1		2	0	No Finding	0	Kidney、Heart	1	1	0	0
2	1	20		0	0	0		10	1	Frontal Lobe	1	Heart、Liver、Kidney、Eye	1	1	0	1
2	0	13		100	1	1		10	0	No Finding	0	Heart	1	0	0	0
2	1	56		50	0	1		9	1	Frontal Lobe	1	Kidney	0	1	0	0
2	1	12		0	0	0		4	0	No Finding	0	0	0	0	0	0
2	1	11		0	0	0		0	1	Parietal Lobe	0	0	0	0	0	0
2	0	31		96	0	1		1	1	Occipital Lobe	0	0	0	0	0	0
2	1	9		0	0	0		0	0	No Finding	0	0	0	0	0	0
2	0	0		0	0	0		3	0	No Finding	0	Kidney、Heart	1	1	0	0
2	0	0		100	1	1		10	0	No Finding	0	0	0	0	0	0
2	1	11		10	1	1		2	0	Lateral Periventricular White Matter三角区	0	0	0	0	0	0
2	1	7		0	0	0		0	0	No Finding	0	0	0	0	0	0
2	0	18		93	0	1		3	0	No Finding	0	Heart、Kidney	1	1	0	0
2	1	46		100	1	1		10	1	Cerebellum	0	0	0	0	0	0
2	1	2		100	1	1		3	0	No Finding	0	0	0	0	0	0
2	1	0		100	1	1		3	0	No Finding	0	0	0	0	0	0
2	1	3		42.8	0	0		18	0	No Finding	0	0	0	0	0	0
2	0	1		40	0	0		11	0	No Finding	0	Heart	1	0	0	0
2	0	3		0	0	0		7	1	Frontal Lobe	1	0	0	0	0	0
2	1	1		100	1	1		0	0	Frontal Lobe	1	0	0	0	0	0
2	0	9		0	0	0		10	0	Frontal Lobe	1	Heart	1	0	0	0
2	1	6		0	0	0		1	1	Parietal Lobe	0	0	0	0	0	0
2	1	11		0	0	0		4	0	Frontal Lobe	1	0	0	0	0	0
2	1	8		99	0	1		1	1	No Finding	0	Heart、Kidney	1	1	0	0
2	0	5		86	0	1		30	1	Lateral Periventricular White Matter	0	Heart	1	0	0	0
2	0	4		0	0	0		6	0	Temporal Lobe	0	0	0	0	0	0
2	1	42		0	0	0		10	0	No Finding	0	0	0	0	0	0
2	1	8		100	1	1		10	0	No Finding	0	Kidney、Heart、	1	0	0	0
2	1	14		0	0	0		0	1	Frontal Lobe	1	0	0	0	0	0
2	0	9		0	0	0		5	0	No Finding	0	0	0	0	0	0
2	0	3		0	0	0		6	0	No Finding	0	Kidney、Heart	1	1	0	0
2	1	22		83	0	1		1	0	No Finding	0	0	0	0	0	0
2	0	12		0	0	0		10	1	Frontal Lobe	1	0	0	0	0	0
2	0	5		0	0	0		10	0	No Finding	0	0	0	0	0	0
2	1	15		70	0	1		4	0	No Finding	0	0	0	0	0	0
2	0	6		50	0	1		6	0	Temporal Lobe	0	Heart、Kidney	1	1	0	0
2	1	11		30	0	1		4	0	No Finding	0	Heart、Kidney	1	1	0	0
2	0	4		99	0	1		10	0	No Finding	0	Kidney、Liver	0	1	0	1
